# Supplementary material for: In Vivo Expression of MHC Class I Genes Depends on the Presence of a Downstream Barrier Element
Source: PubMed Central journal article supplement (PMC2727697; doi:10.1371/journal.pone.0006748), 2009-08-26

Figure S1

qRT-PCR Analysis of PD1cDNAint1-2/Bam

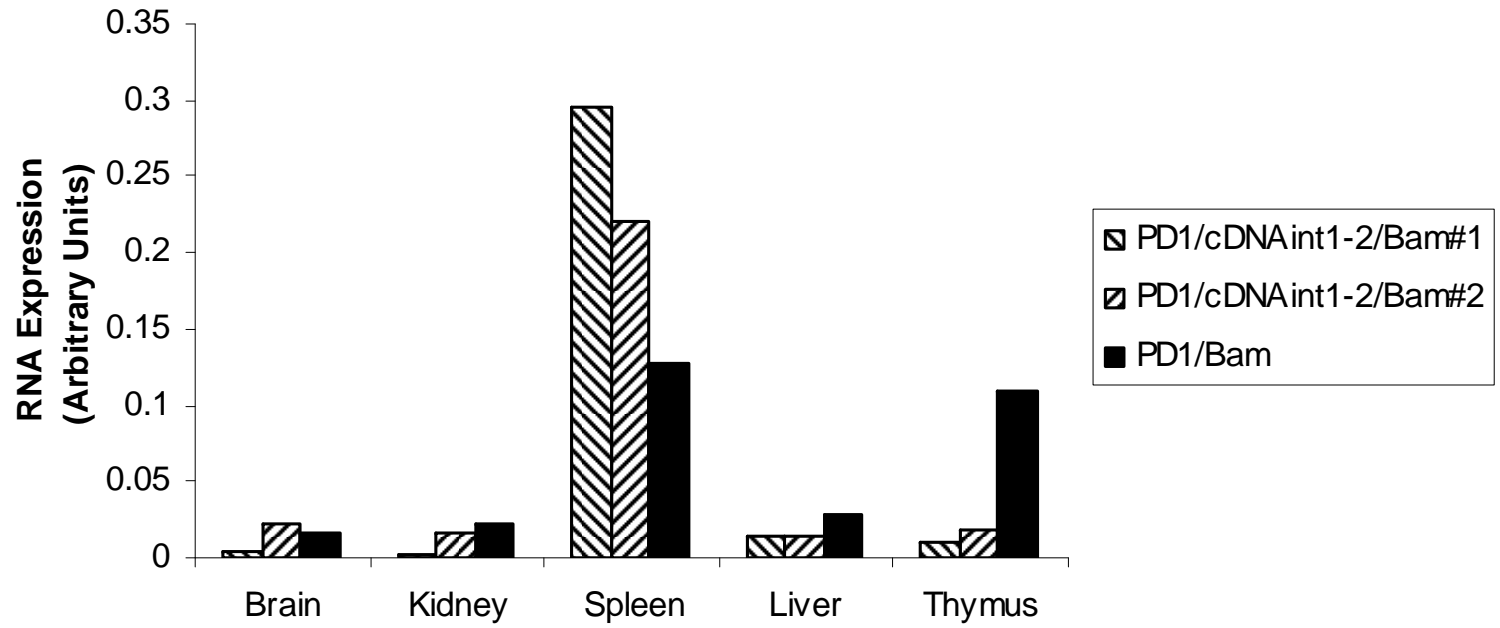

Supplement: pone.0006748.s001.pdf [file pone.0006748.s001.pdf]
